# Supplementary material for: Maternal liver-related symptoms during pregnancy in primary sclerosing cholangitis
Source: PubMed Central journal article supplement (PMC10711472; doi:10.1016/j.jhepr.2023.100951), 2023-10-31
Supplement: mmc1.pdf [file mmc1.pdf]

# **Maternal liver-related symptoms during pregnancy in primary sclerosing cholangitis**

Jeremy S Nayagam, Tobias J Weismüller, Piotr Milkiewicz, Karolina M Wronka, Emil Bik, Christoph Schramm, Katja Fuessel, Taotao Zhou, Johannes Chang, Martti Färkkilä, Ylva Carlsson, Anastasia Lundman, Nora Cazzagon, Giorgia Corrà, Eirini Rigopoulou, George N Dalekos, Aiva Lundberg Båve, Annika Bergquist, Karim Ben Belkacem, Marco Marzioni, Martina Mancinelli, Xavier Verhelst, Hanns-Ulrich Marschall, Michael A Heneghan, Deepak Joshi, the International PSC Study Group (IPSCSG)

## Table of contents

|               |    |
|---------------|----|
| Fig. S1.....  | 2  |
| Fig. S2.....  | 3  |
| Table S1..... | 5  |
| Table S2..... | 6  |
| Table S3..... | 7  |
| Table S4..... | 9  |
| Table S5..... | 10 |

**Fig. S1. Study design and subject disposition.**

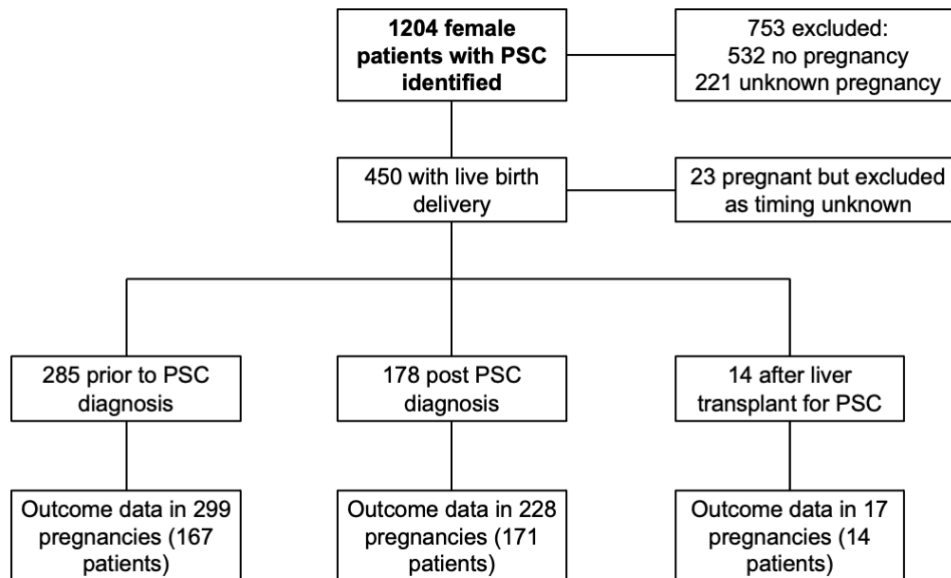

**Fig. S2A. Cumulative incidence of clinical events with Kaplan-Meier estimates for time to liver transplantation or death (transplant-free survival) from time of pregnancy prior to PSC diagnosis. 20 year transplant-free survival in those with liver abnormalities in pregnancy (log-rank, P=0.01).**

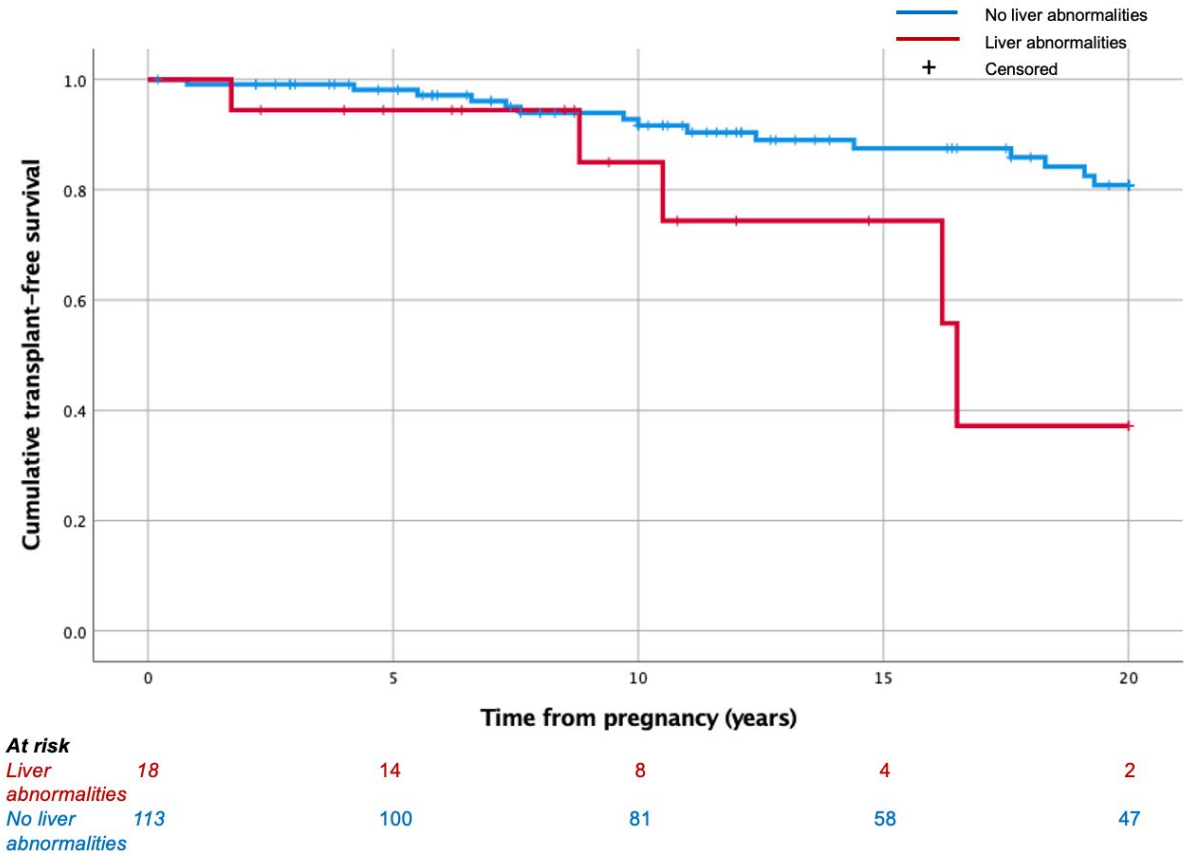

**Fig. S2B. Cumulative incidence of clinical events with Kaplan-Meier estimates for time to liver transplantation or death (transplant-free survival) from time of PSC diagnosis in those with pregnancy prior to diagnosis. 20 year transplant-free survival in those with liver abnormalities in pregnancy (log-rank, P=0.21).**

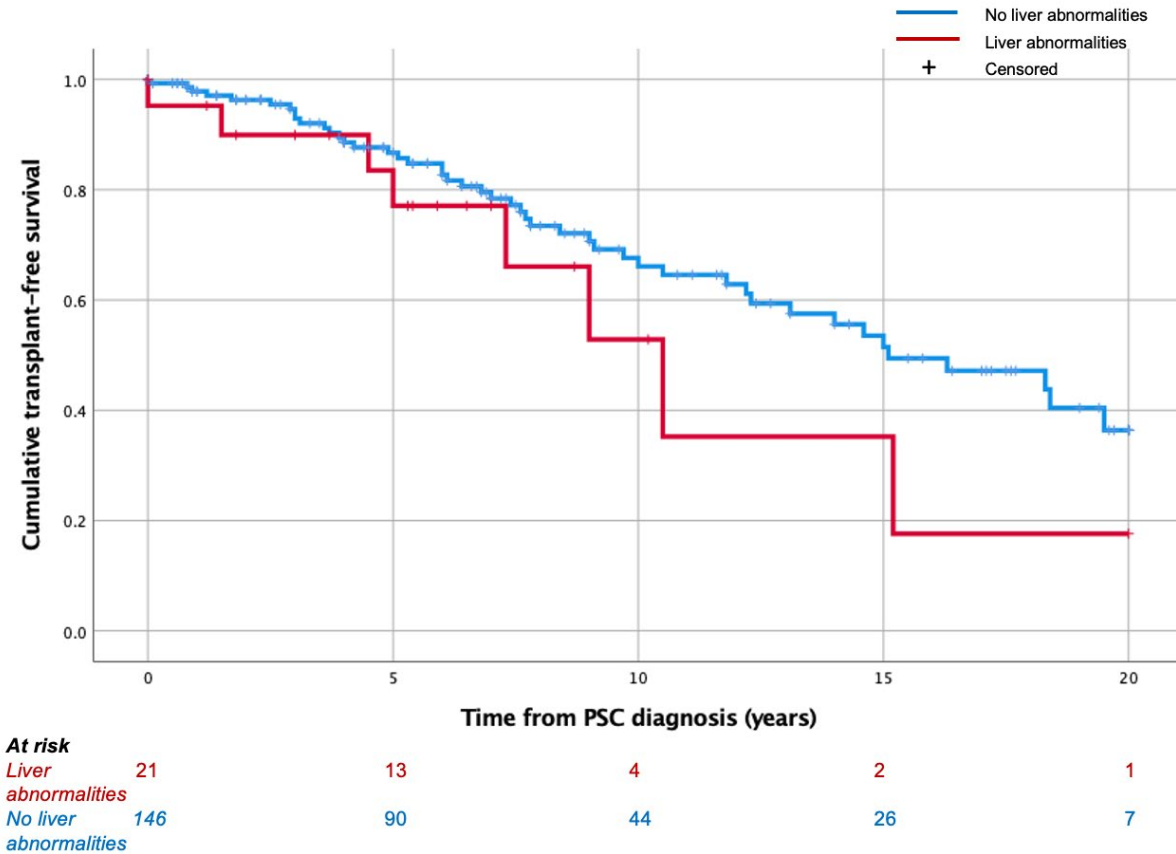

**Table S1. Clinical characteristics of subgroup of patients who were pregnant prior to their diagnosis of PSC (n=167).**

|                                                                         | N=167             |
|-------------------------------------------------------------------------|-------------------|
| <b>Age at delivery, median (IQR), years</b>                             | 28.7 (25.2-31.8), |
| <b>Age at PSC diagnosis, median (IQR), years</b>                        | 38.8 (32.4-48.1)  |
| <b>Interval between delivery and PSC diagnosis, median (IQR), years</b> | 5.8 (1.7-17.1)    |
| <b>Large duct</b>                                                       | 132 (79.0%)       |
| <b>Small duct</b>                                                       | 14 (8.4%)         |
| <b>PSC/AIH overlap</b>                                                  | 19 (11.4%)        |
| <b>IgG4-SC</b>                                                          | 2 (1.2%)          |
| <b>IBD</b>                                                              | 85 (50.9%)        |

Abbreviations: PSC, primary sclerosing cholangitis; AIH, autoimmune hepatitis; IgG4-SC, immunoglobulin G4 sclerosing cholangitis; IBD, inflammatory bowel disease.

Continuous variables are expressed as median (IQR), categorical variables are represented as number (%).

**Table S2. Clinical characteristics of subgroup of patients who were pregnant after their diagnosis of PSC (n=178).**

|                                                              | N=178            |
|--------------------------------------------------------------|------------------|
| <b>Age at PSC diagnosis, median (IQR), years</b>             | 26.8 (21.5-30.7) |
| <b>Age at delivery, median (IQR), years</b>                  | 32.3 (28.7-35.7) |
| <b>PSC duration at time of delivery, median (IQR), years</b> | 4.4 (2.2-8.9)    |
| <b>Large duct</b>                                            | 146 (82.0%)      |
| <b>Small duct</b>                                            | 8 (4.5%)         |
| <b>PSC/AIH overlap</b>                                       | 24 (13.5%)       |
| <b>IBD</b>                                                   | 122 (66.5%)      |

Abbreviations: PSC, primary sclerosing cholangitis; AIH, autoimmune hepatitis; IBD, inflammatory bowel disease.

Continuous variables are expressed as median (IQR), categorical variables are represented as number (%).

**Table S3. Univariate analysis of continued UDCA use during pregnancy and change in liver blood tests from baseline values.**

|                                                       | <b>UDCA not used previously or stopped</b> | <b>UDCA continued</b> | <b>P</b> |
|-------------------------------------------------------|--------------------------------------------|-----------------------|----------|
| <b>Bilirubin</b>                                      |                                            |                       |          |
| <i>Normal prior to conception</i>                     | 33/38 (86.8%)                              | 53/65 (81.5%)         | 0.48     |
| <i>&gt;25% rise from baseline during pregnancy</i>    | 4/34 (11.8%)                               | 10/51 (19.6%)         | 0.34     |
| <i>&gt;25% rise post from baseline after delivery</i> | 8/32 (25.0%)                               | 17/53 (32.1%)         | 0.49     |
| <b>ALP</b>                                            |                                            |                       |          |
| <i>Normal prior to conception</i>                     | 19/42 (45.2%)                              | 33/68 (48.5%)         | 0.74     |
| <i>&gt;25% rise from baseline during pregnancy</i>    | 7/36 (19.4%)                               | 16/55 (29.1%)         | 0.30     |
| <i>&gt;25% rise post from baseline after delivery</i> | 17/36 (47.2%)                              | 27/58 (46.6%)         | 0.95     |
| <b>ALT</b>                                            |                                            |                       |          |
| <i>Normal prior to conception</i>                     | 9/22 (40.9%)                               | 24/46 (52.2%)         | 0.39     |
| <i>&gt;25% rise from baseline during pregnancy</i>    | 2/20 (10.0%)                               | 7/41 (17.1%)          | 0.70     |
| <i>&gt;25% rise post from baseline after delivery</i> | 8/29 (27.6%)                               | 12/34 (35.3%)         | 0.51     |
| <b>AST</b>                                            |                                            |                       |          |
| <i>Normal prior to conception</i>                     | 14/32 (43.8%)                              | 12/42 (28.6%)         | 0.18     |
| <i>&gt;25% rise from baseline during pregnancy</i>    | 5/30 (16.7%)                               | 6/32 (18.8%)          | 0.83     |

|                                                    |                     |                    |             |
|----------------------------------------------------|---------------------|--------------------|-------------|
| >25% rise post from baseline after delivery        | 10/18 (55.6%)       | 16/39 (41.0%)      | 0.31        |
| <b>GGT</b>                                         |                     |                    |             |
| Normal prior to conception                         | 9/27 (33.3%)        | 16/51 (31.4%)      | 0.86        |
| <b>&gt;25% rise from baseline during pregnancy</b> | <b>7/23 (30.4%)</b> | <b>3/35 (8.6%)</b> | <b>0.04</b> |
| >25% rise post from baseline after delivery        | 9/24 (37.5%)        | 8/39 (20.5%)       | 0.14        |

Abbreviations; UDCA, ursodeoxycholic acid; ALP, alkaline phosphatase; ALT, alanine aminotransferase; AST, aspartate aminotransferase; GGT, gamma-glutamyl transferase.

Categorical variables are represented as number (%), or where data is missing number/number available (%). Subgroup differences were analysed by Chi-squared or Fisher's exact tests.



**Table S4. Reported symptoms during pregnancy after PSC diagnosis (n=228).**

|                                                                    | N=228      |
|--------------------------------------------------------------------|------------|
| <b>Clinical diagnosis of intrahepatic cholestasis of pregnancy</b> | 33 (14.5%) |
| <b>Pruritus</b>                                                    |            |
| <i>Stable or improved from baseline</i>                            | 33 (14.5%) |
| <i>Worsened from baseline</i>                                      | 23 (10.1%) |
| <i>Newly developed</i>                                             | 34 (14.9%) |
| <b>Cholangitis</b>                                                 |            |
| <i>Treated with antibiotics as outpatient</i>                      | 3 (1.3%)   |
| <i>Treated with antibiotics as inpatient</i>                       | 1 (0.4%)   |
| <b>Any worsening liver-related symptom during pregnancy</b>        | 66 (28.9%) |

Categorical variables are represented as number (%).

**Table S5. Immunosuppression medications and combination regimens used during pregnancy in patients who had undergone liver transplantation for PSC.**  
Data was not available in 5 patients.

|                                              | N=12     |
|----------------------------------------------|----------|
| <b>Medications</b>                           |          |
| Corticosteroid                               | 9 (75%)  |
| Ciclosporin                                  | 2 (17%)  |
| Tacrolimus                                   | 10 (83%) |
| Azathioprine                                 | 8 (67%)  |
| <b>Combination regimens</b>                  |          |
| Tacrolimus monotherapy                       | 2 (17%)  |
| Tacrolimus and corticosteroid                | 2 (17%)  |
| Tacrolimus and azathioprine                  | 1 (8%)   |
| Tacrolimus, corticosteroid and azathioprine  | 5 (42%)  |
| Ciclosporin, corticosteroid and azathioprine | 2 (17%)  |

Categorical variables are represented as number (%).
